# Supplementary material
Source: PubMed Central journal article supplement (PMC7549721)
Supplement: KRNB_A_1766861_SM3326.pdf [file KRNB_A_1766861_SM3326.pdf]

## Supplementary Information

### Oxidative stress enhances the expression of 2',3'-cyclic phosphate-containing RNAs

Megumi Shigematsu and Yohei Kirino

## Supplementary Figure Legends

### Figure S1. Identification of cP-containing tiRNAs by cP-RNA-seq

(A) Production of tiRNAs. Upon various stress stimuli, ANG cleaves the anticodon-loops of tRNAs to generate tiRNAs. ANG-generated 5'-tiRNAs contain a cP and can be captured by cP-RNA-seq. Standard small RNA-seq can only sequence the RNAs which contain 5'-P and 3'-OH ends, such as 5'-tRFs. “aa” stands for amino acid.

(B) Schematic representation of cP-RNA-seq and standard RNA-seq methods. Cellular RNAs can have various terminal phosphate states. While standard small RNA-seq captures the RNAs with 5'-P and 3'-OH ends, cP-RNA-seq specifically captures cP-RNAs. “AD” stands for adapter.

### Figure S2. cP-RNAs identified by cP-RNA-seq

(A) Proportion of identified cP-RNAs annotated to the indicated RNAs.

(B) Proportion of the 5'-terminal nucleotide of the 5'-tRNA<sup>HisGUG</sup> halves.

(C) Expression profiles of the 3'-tiRNAs derived from respective cyto tRNA isoacceptors. The color key was obtained based on log<sub>2</sub> reads per million (RPM) of the 3'-tiRNAs.

### Figure S3. Confirmation of the expression of tiRNAs by northern blots

Total RNAs extracted from SA-treated HeLa or U2OS cells were subjected to northern blots for the indicated tiRNAs.

#### **Figure S4. Isodecoder sequences of the four selected cyto tRNAs**

Clustal Omega was used to obtain the sequence alignment of isodecoders. Numbers in parentheses indicate the number of genes encoding the isodecoder. The most major 5'-tiRNA sequence in each isodecoder is shown as black bold characters. The sequences that were not identified or identified only as minor species (less than 10 reads in any library) are shown in grey. A dagger denotes identical sequences of 5'-tiRNAs in each tRNA. The nucleotides that are not identical among the detected 5'-tiRNAs (shown as bold) are marked as red dots.

#### **Figure S5. Alignment patterns of cP-RNAs for 28S rRNA**

The positions of representative cP-RNAs, cPR-28S-np1s, cPR-28S-np11, and cPR-28S-np3806, are indicated.

#### **Figure S6. Alignment patterns of cP-RNAs for LPP and SMG1 mRNAs**

The positions of representative cP-RNAs, cPR-LPP and cPR-SMG1, are indicated.

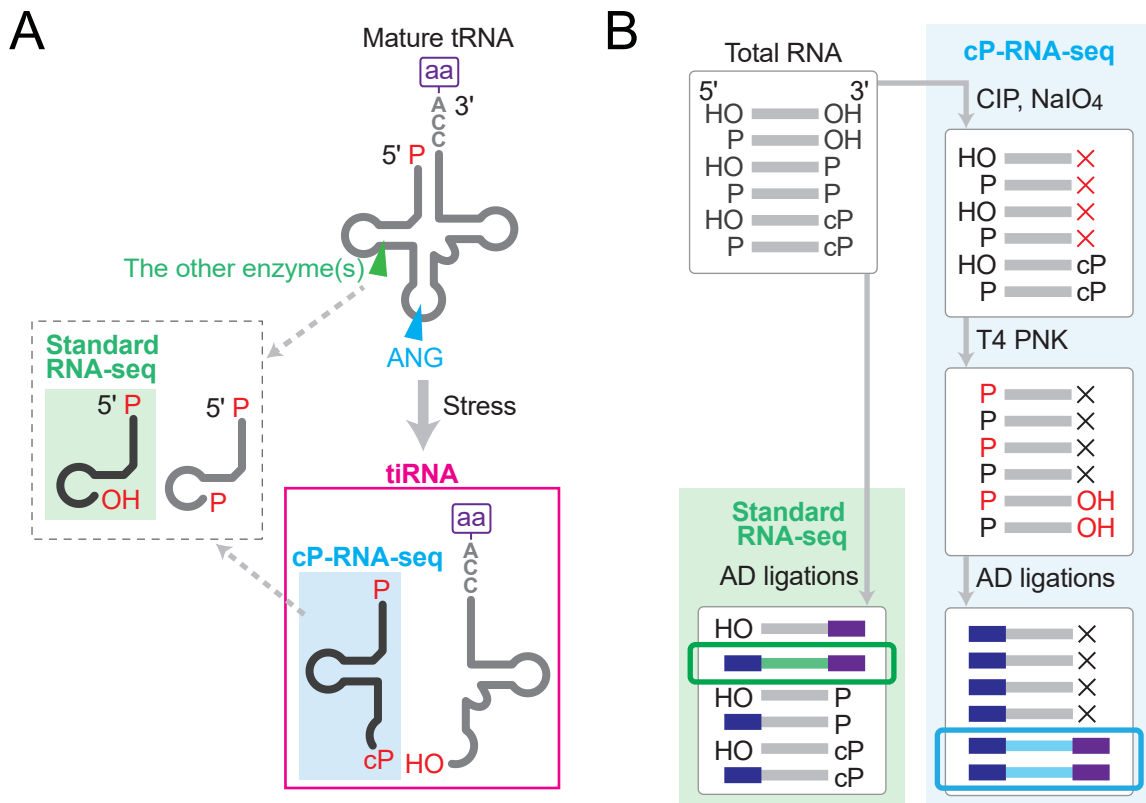

Figure S1

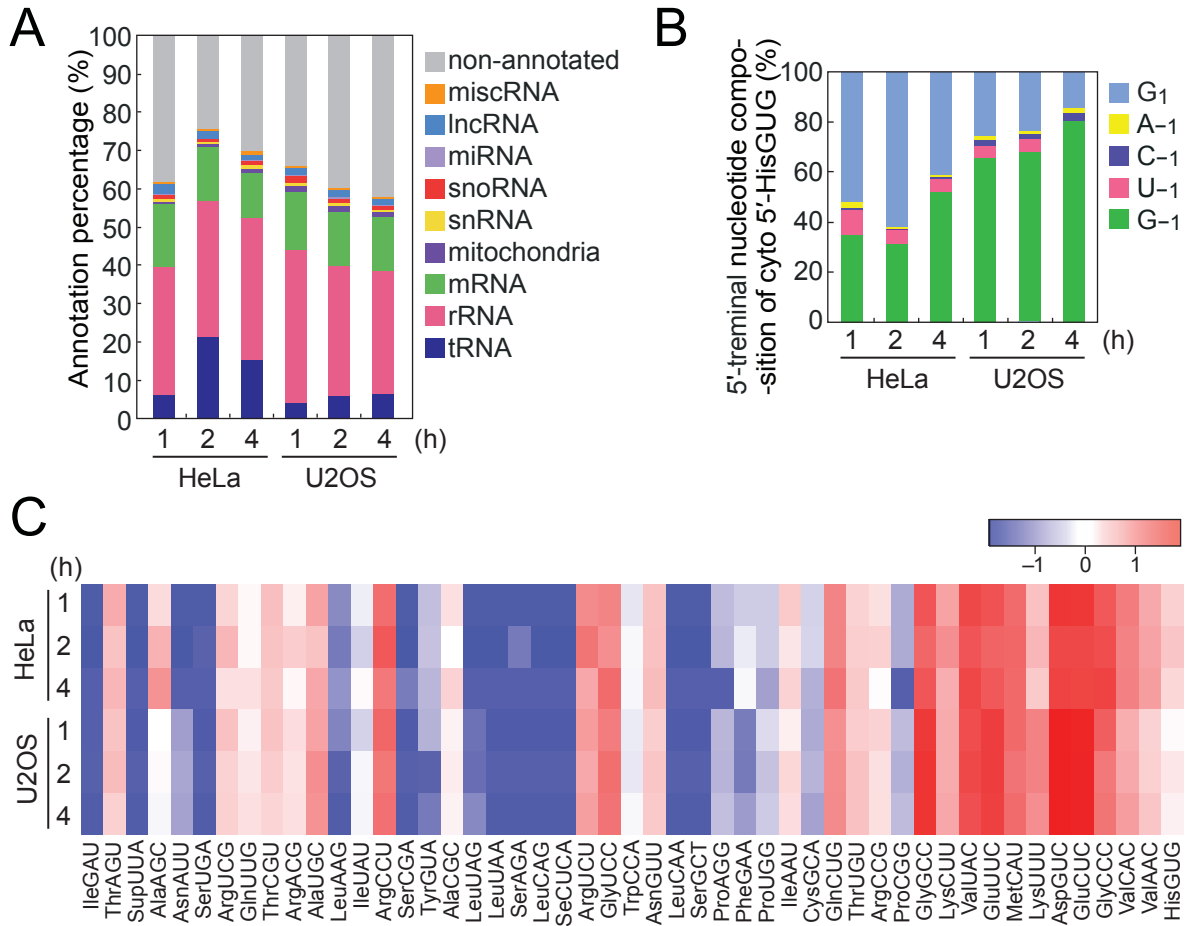

Figure S2

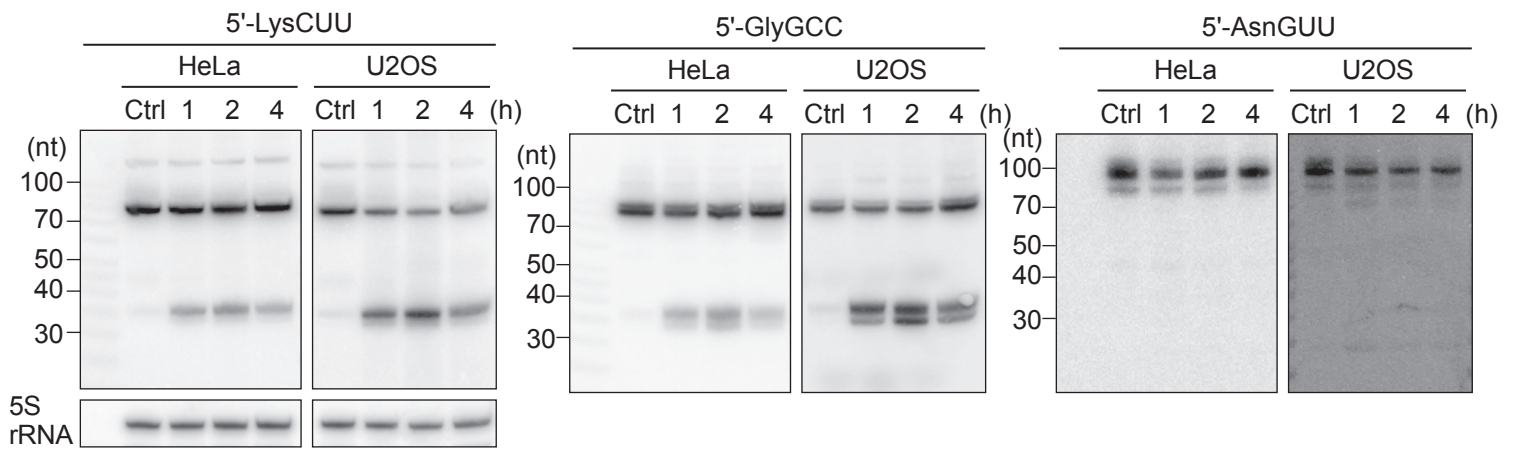

Figure S3

tRNA<sup>Lys</sup>CUU

|          |                                               |                            |                  |    |
|----------|-----------------------------------------------|----------------------------|------------------|----|
| id-1(5)  | <b>GCCC</b> GGCTAGCTCAGTCGGTAGAGCATGAGACTCTT  | AATCTCAGGGTCGTGGGTTTCGAGC  | CCCACGTTGGGCACCA | 76 |
| id-2(2)† | <b>GCCC</b> GGCTAGCTCAGTCGGTAGAGCATGGGACTCTT  | AATCCACAGGGTCGTGGGTTTCGAGC | CCCACGTTGGGCACCA | 76 |
| id-3(1)† | <b>GCCC</b> GGCTAGCTCAGTCGGTAGAGCATGGGACTCTT  | AATCTCAGGGTCGTGGGTTTCGAGC  | CCCACGTTGGGCACCA | 76 |
| id-4(1)  | <b>GCCC</b> GGCTAGCTCAGTCGGTAGAGCATGAGACTCTT  | AATCTCAGGGTCGTGGGTTTCGAGC  | CCCACGTTGGGCACCA | 76 |
| id-5(1)  | <b>GCCC</b> AGCTAGCTCAGTCGGTAGAGCATAAAGACTCTT | AATCTCAGGGTTGTGGATTCTGTC   | CCCATGCTGGGTGCCA | 76 |
| id-6(1)  | <b>GCCC</b> AGCTAGCTCAGTCGGTAGAGCATGAGACTCTT  | AATCTCAGGGTCATGGGTTTGAGC   | CCCACGTTTGGTGCCA | 76 |
| id-7(1)  | <b>GCCC</b> GGCTAGCTCAGTCGATAGAGCATGAGACTCTT  | AATCTCAGGGTCGTGGGTTTCGAGC  | CCCACGTTGGGCACCA | 76 |
| id-8(1)  | GCCC <b>GA</b> CTACCTCAGTCGGTGGAGCATGGGACTCTT | CATCCACAGGGTTGTGGTTTCGAGC  | CCCACATTGGGCACCA | 76 |
| id-9(1)  | GCCTGGCTAGCTCAGTCGGCAAAGCATGAGACTCTT          | AATCTCAGGGTCGTGGGCTCGAGC   | TCCATGTTGGGCACCA | 76 |
| id-10(1) | GACGAGCTAGCTCAGTCGGTAGAGCATGGGACTCTT          | AATCCACAGGGTCGTGGGTTTGAGC  | CCCATGTTGGGCACCA | 76 |
| id-11(1) | AACCGAATAGCTTAGTTGATGAAGCGTGAGACTCTT          | AATCTCAGGGTAGTGGGTTCAAGC   | CCCACATTGGACACCA | 76 |
| id-12(1) | CTGCAGCTAGCTCAGTCGGTAGAGCATGAGACTCTT          | AATCTCAGGGTCATGGGTTTCGTC   | CCCATGTTGGGTGCCA | 76 |

\*\* \* \*\* \* \* \*\* \* \*\* \* \*\* \*
\*\* \* \*\* \*
\*\* \* \*\* \*
\*\* \* \*\* \*
\*\* \* \*\* \*
\*\* \* \*\* \*
\*\* \* \*\* \*
\*\* \* \*\* \*
\*\* \* \*\* \*
\*\* \* \*\* \*
\*\* \* \*\* \*
\*\* \* \*\* \*
\*\* \* \*\* \*
\*\* \* \*\* \*
\*\* \* \*\* \*
\*\* \* \*\* \*
\*\* \* \*\* \*
\*\* \* \*\* \*
\*\* \* \*\* \*
\*\* \* \*\* \*
\*\* \* \*\* \*

D loop
Anticodon loop
TΨC loop

tRNA<sup>Gly</sup>GCC

|          |                                                |                              |                |    |
|----------|------------------------------------------------|------------------------------|----------------|----|
| id-1(5)  | <b>GCAT</b> GGTGGTTCAGTGGTAGAATTC <b>CGCCT</b> | GCCACGCGGGAGGCCCGGGTTCGATTCC | CGGCCATGCACCA  | 74 |
| id-2(6)† | <b>GCAT</b> GGTGGTTCAGTGGTAGAATTC <b>CGCCT</b> | GCCACGCGGGAGGCCCGGGTTCGATTCC | CGGCCATGCACCA  | 74 |
| id-3(1)† | <b>GCAT</b> GGTGGTTCAGTGGTAGAATTC <b>CGCCT</b> | GCCACGCGGGAGGCCCGGGTTCGATTCC | CGGCCAGTGCACCA | 74 |
| id-4(1)† | <b>GCAT</b> GGTGGTTCAGTGGTAGAATTC <b>CGCCT</b> | GCCATGCGGGAGGCCCGGGTTCGATTCC | TGGCCAATGCACCA | 74 |
| id-5(1)  | <b>GCAT</b> GGTGGTTCAGTGGTAGAATTC <b>CGCCT</b> | GCCACGCGGGAGGCCCGGGTTCGATTCC | TGGCCATGCACCA  | 74 |
| id-6(1)  | GCATGGTGGTTCAGTGGTAGAATTT <b>CACCT</b>         | GCCATGCAGGAGGTCAGGTTCAATTC   | TGGCTATGCACCA  | 74 |

\*\*\*\* \* \*\* \* \*\* \* \*\* \* \*\* \* \*\* \* \*\* \* \*\* \*
\*\*\*\* \* \*\* \* \*\* \* \*\* \* \*\* \* \*\* \* \*\* \* \*\* \*
\*\*\*\* \* \*\* \* \*\* \* \*\* \* \*\* \* \*\* \* \*\* \* \*\* \*
\*\*\*\* \* \*\* \* \*\* \* \*\* \* \*\* \* \*\* \* \*\* \* \*\* \*
\*\*\*\* \* \*\* \* \*\* \* \*\* \* \*\* \* \*\* \* \*\* \* \*\* \*

tRNA<sup>Gly</sup>CCC

|         |                                                 |                               |                |    |
|---------|-------------------------------------------------|-------------------------------|----------------|----|
| id-1(2) | <b>GCAT</b> GGTGGTTCAGTGGTAGAATTC <b>CGCCT</b>  | CCCACGCGGGAGACCCGGGTTCAATTCC  | CGGCCAATGCACCA | 74 |
| id-2(2) | <b>GCGC</b> CGCTGGTGTAGTGGTAGAATTC <b>CGCCT</b> | CCATTCTTGCACCCGGGTTTCGATTCC   | CGGGCGGCACCA   | 74 |
| id-3(1) | <b>GCGT</b> GGTGGTTCAGTGGTAGAATTC <b>CGCCT</b>  | CCCATGCGGGAGACCCGGGTTCAATTCC  | CGGCCACTGCACCA | 74 |
| id-4(1) | <b>GCAT</b> GGTGGTTCAGTGGTAGAATTC <b>CGCCT</b>  | CCCACGCGGGAGACCCAGGTTTCGATTCC | TGGCCAATGCACCA | 74 |
| id-5(1) | GCCTTGGTGGTGCAGTGGTAGAATTC <b>CGCCT</b>         | CCCACGTGGGAGACCCGGGTTCAATTCC  | CGGCCAATGCACCA | 74 |

\*\* \* \*\* \* \*\* \* \*\* \* \*\* \* \*\* \* \*\* \* \*\* \*
\*\* \* \*\* \* \*\* \* \*\* \* \*\* \* \*\* \* \*\* \* \*\* \*
\*\* \* \*\* \* \*\* \* \*\* \* \*\* \* \*\* \* \*\* \* \*\* \*
\*\* \* \*\* \* \*\* \* \*\* \* \*\* \* \*\* \* \*\* \* \*\* \*
\*\* \* \*\* \* \*\* \* \*\* \* \*\* \* \*\* \* \*\* \* \*\* \*

tRNA<sup>Glu</sup>CUC

|          |                                                  |                              |                 |    |
|----------|--------------------------------------------------|------------------------------|-----------------|----|
| id-1(7)† | <b>TCC</b> CTGGTGGTCTAGTGGT <b>TAGGATTCGCGCT</b> | CTCACCGCCGGCCCGGGTTCGATTTC   | CCGGTCAGGGAACCA | 75 |
| id-2(1)† | <b>TCC</b> CTGGTGGTCTAGTGGT <b>TAGGATTCGCGCT</b> | CTCACCGCCGGCCCGGGTTCGATTTC   | CCGGTCAGGGAACCA | 75 |
| id-3(1)  | CCCCTGGTGGTCTAGTGCCTAGGATTCGGTGCCT               | CTCACCCTGCTGCTGCTGCTTCGATTTC | CCGGTCAGGGAACCA | 75 |
| id-4(1)  | CCCCGGTGGTGTAGTGGATGGGATTTGGCGCT                 | CTCACCATGGCCCGGATTTCGATTTC   | CCGGTCAGGGAACCA | 75 |
| id-5(1)  | CCCCTGGTGGTCTATCGGTTAGGATTCAGACCT                | CTCACACTGCTACCCATGCTCGATTTC  | CTGGTCAGGGAACCA | 75 |
| id-6(1)  | -TCCTTGATGTCTAGTGGT <b>TAGGATTTGGTGCCT</b>       | CTCCTGACGACGCTGGGTTCAATTC    | TCAGTCAGGGAACCA | 74 |
| id-7(1)  | TCCCTGGT <b>AGT</b> CTAGTGGCTAAAGTTTGGCGCT       | CTCACCCGGGACTG---GTTGATTTC   | CAGATCAGGGGACCA | 72 |

\*\* \* \*\* \* \*\* \* \*\* \* \*\* \* \*\* \* \*\* \* \*\* \*
\*\* \* \*\* \* \*\* \* \*\* \* \*\* \* \*\* \* \*\* \* \*\* \*
\*\* \* \*\* \* \*\* \* \*\* \* \*\* \* \*\* \* \*\* \* \*\* \*
\*\* \* \*\* \* \*\* \* \*\* \* \*\* \* \*\* \* \*\* \* \*\* \*
\*\* \* \*\* \* \*\* \* \*\* \* \*\* \* \*\* \* \*\* \* \*\* \*

Figure S4

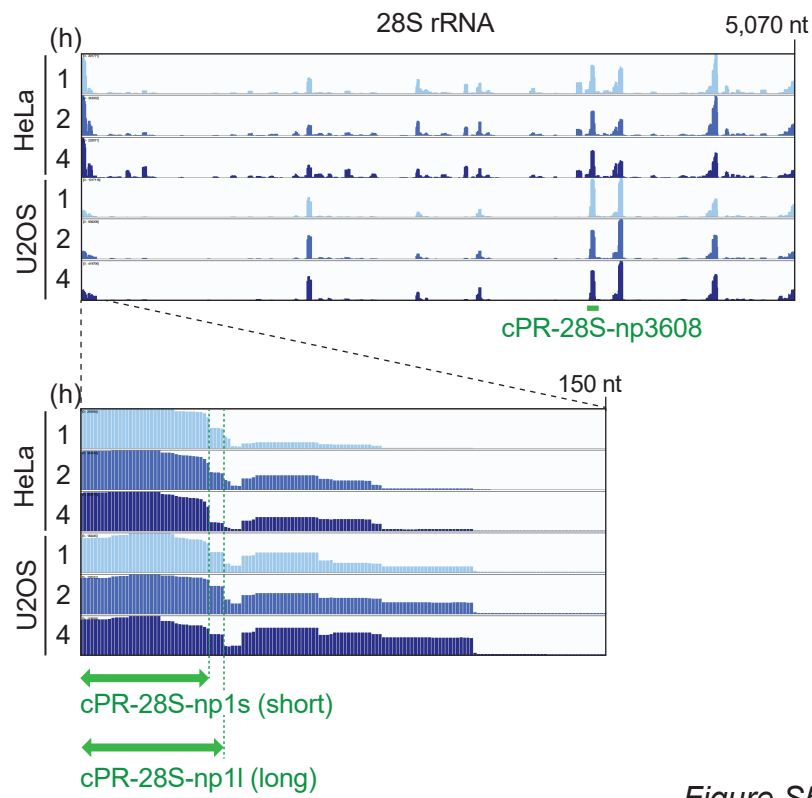

Figure S5

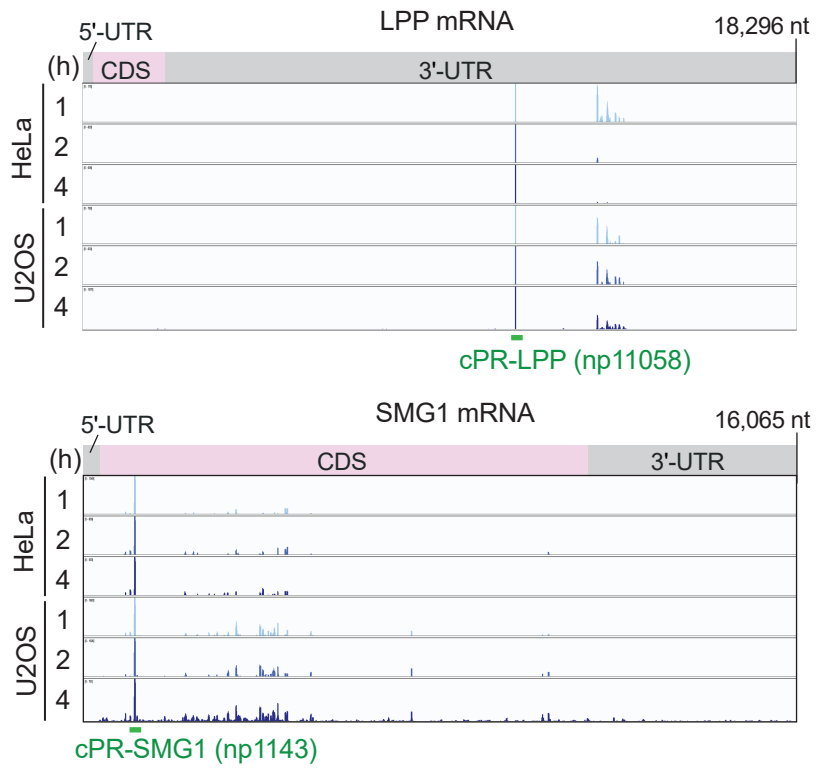

Figure S6

## Supplementary Tables

**Table S1. Read numbers of cP-RNA libraries obtained from cP-RNA-seq**

|                | HeLa 1 h   | HeLa 2 h   | HeLa 4 h   | U2OS 1 h    | U2OS 2 h   | U2OS 4 h   |
|----------------|------------|------------|------------|-------------|------------|------------|
| Total          | 49,594,334 | 64,937,613 | 45,795,016 | 116,510,986 | 86,468,731 | 73,853,430 |
| Quality filter |            |            |            |             |            |            |
| :3'-AD trim    | 48,629,399 | 63,476,397 | 44,918,050 | 109,268,425 | 78,695,833 | 69,775,115 |
| :<20 nt        | 4,995,252  | 7,574,071  | 6,771,398  | 17,267,100  | 3,477,700  | 5,943,575  |
| :>45 nt        | 3,164,922  | 3,639,718  | 2,303,203  | 13,137,807  | 14,451,723 | 7,991,579  |
| :20–45 nt      | 41,434,160 | 53,723,824 | 36,720,415 | 86,106,079  | 68,539,308 | 59,918,276 |

**Table S2. Sequences of TaqMan probes and primers for TaqMan RT-qPCR**

| Target               | Probe/primer   | Sequence (5' to 3')                                |
|----------------------|----------------|----------------------------------------------------|
| cPR-28S-np1s         | Forward primer | TACGGCCATACCACCCTGAAC                              |
|                      | TaqMan probe   | /56-FAM/CGACCCGCT/ZEN/GAATTTGAACACTGCGT/3IABkFQ/   |
| cPR-28S-np11         | Forward primer | TACGGCCATACCACCCTGAAC                              |
|                      | TaqMan probe   | /56-FAM/CCCGCTGAA/ZEN/TTTAAGCGAACACTGCGTT/3IABkFQ/ |
| cPR-28S-np3608       | Forward primer | TCCGACTGTTTGAACACTGCG                              |
|                      | TaqMan probe   | /56-FAM/TCCGACTGT/ZEN/TTGAACACTGCG/3IABkFQ/        |
| cPR-LPP              | Forward primer | AAATGGGCCGGGCGCGGT                                 |
|                      | TaqMan probe   | /56-FAM/CGTGCCTGT/ZEN/GAACACTGCGTT/3IABkFQ/        |
| cPR-SMG1             | Forward primer | AGGTCTCCAAGGTGAACAGCC                              |
|                      | TaqMan probe   | /56-FAM/CATGTTGGA/ZEN/ACGAACACTGCGTTTG/3IABkFQ/    |
| 5S rRNA<br>(control) | Forward primer | AAAGCACT AGAGACTGTAGGAG                            |
|                      | TaqMan probe   | /56-FAM/CCTTTTCAT/ZEN/CTGTGAACACTGCG/3IABkFQ/      |

All synthetic probes and primers used in this study were synthesized by Integrated DNA Technologies (the abbreviations within the sequences are according to the company). For TaqMan RT-qPCR, universal reverse primer (5'-GATCGTCGGACTGTAGAACTC-3') was used. TaqMan probes contain 6-carboxyfluorescein (FAM) as the fluorophore and ZEN/Iowa Black as the quencher.
